# Supplementary material for: Pre-existing Depression among Newly Diagnosed Dyslipidemia Patients and Cardiovascular Disease Risk
Source: PubMed Central journal article supplement — Diabetes Metab J. 2019 Nov 1;44(2):307–15. doi: 10.4093/dmj.2019.0002 (PMC7188974; doi:10.4093/dmj.2019.0002), 2019-11-01
Supplement: dmj-44-307-s003.pdf [file dmj-44-307-s003.pdf]

**Supplementary Table 3.** Sensitivity analysis on the association of depression within 3 years before dyslipidemia diagnosis on cardiovascular disease after propensity score matching

| Variable                  | Cardiovascular disease |                  | Coronary heart disease |                  | Stroke           |                  |
|---------------------------|------------------------|------------------|------------------------|------------------|------------------|------------------|
|                           | No depression          | Depression       | No depression          | Depression       | No depression    | Depression       |
| Events                    | 188                    | 239              | 82                     | 121              | 111              | 120              |
| Person-years              | 11,653                 | 13,065           | 11,653                 | 13,065           | 11,653           | 13,065           |
| aHR (95% CI) <sup>a</sup> | 1.00 (reference)       | 1.39 (1.13–1.72) | 1.00 (reference)       | 1.53 (1.12–2.10) | 1.00 (reference) | 1.26 (0.95–1.67) |

aHR, adjusted hazard ratio; CI, confidence interval.

<sup>a</sup>Hazard ratio calculated by Cox proportional hazards regression analysis after adjustments for age, sex, household income, smoking, physical activity, alcohol consumption, body mass index, systolic blood pressure, total cholesterol, fasting serum glucose, statin compliance, Charlson comorbidity index, and index year.
